# Supplementary material for: Synthesis and anticancer activity of two highly water-soluble and ionic Pt( iv ) complexes as prodrugs for Pt( ii ) anticancer drugs
Source: Royal Society of Chemistry journal article supplement (doi:10.1039/d2md00004k), 2022-01-01
Supplement: d2md00004k1.pdf [file d2md00004k1.pdf]

## Supplementary

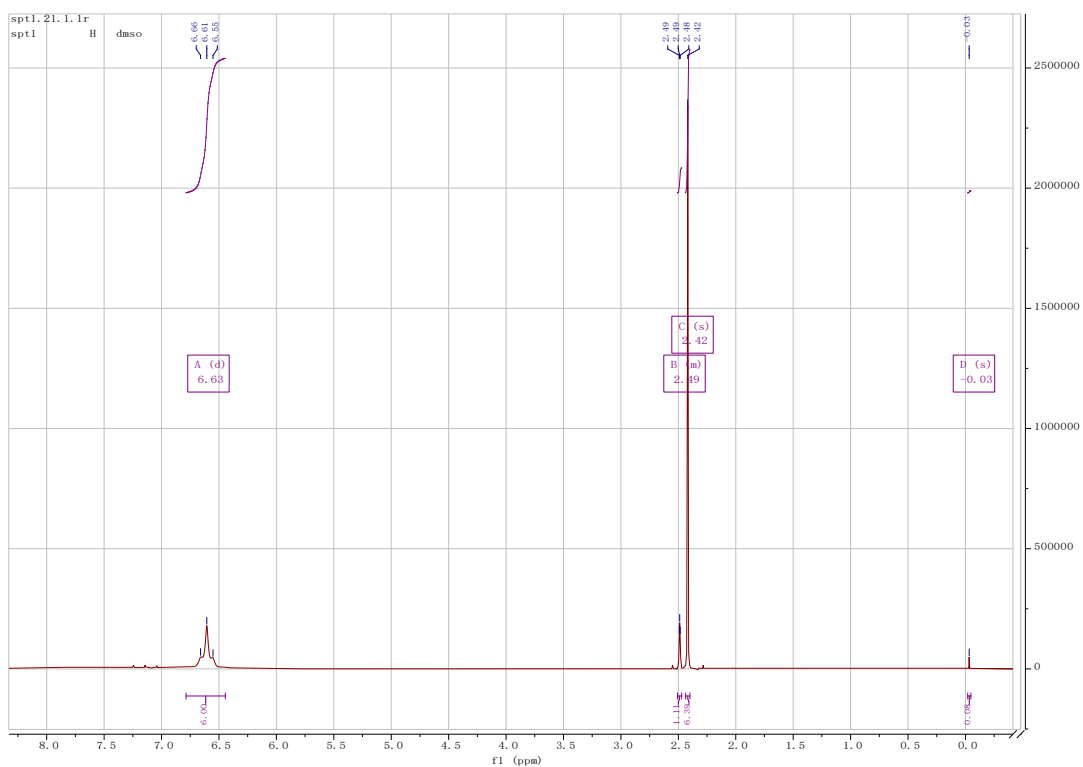

Fig. S1 <sup>1</sup>H NMR spectra of SPT-1

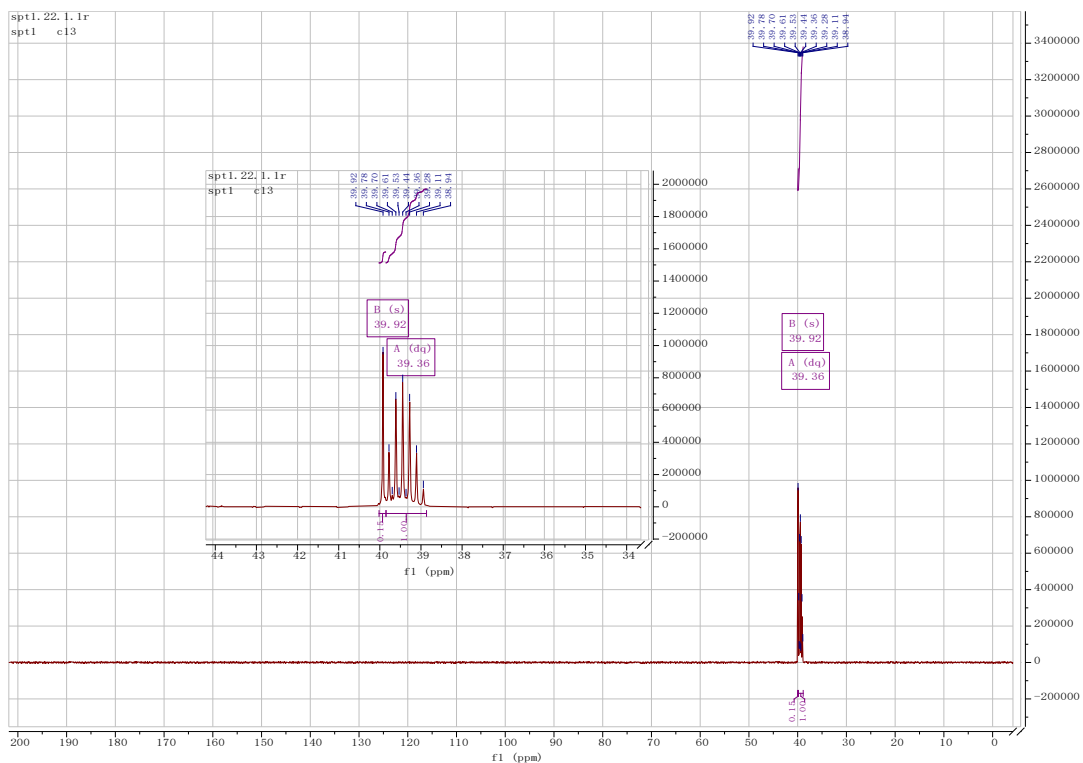

Fig. S2 <sup>13</sup>C NMR spectra of SPT-1

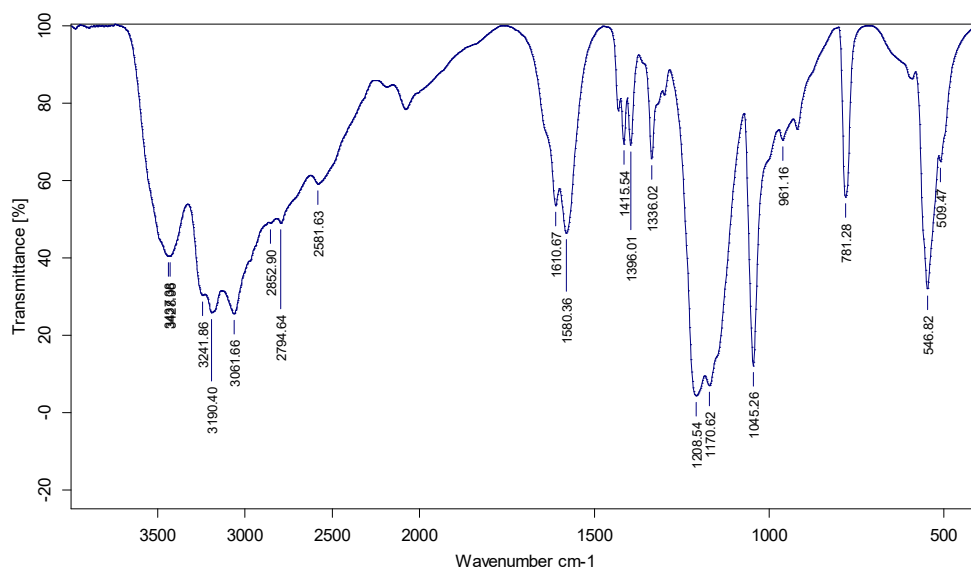

|  |  |  |  |
|--|--|--|--|
|  |  |  |  |
|  |  |  |  |
|  |  |  |  |

Fig. S3 IR spectra of SPT-1

|               |                 |                 |                      |               |                      |                        |         |
|---------------|-----------------|-----------------|----------------------|---------------|----------------------|------------------------|---------|
| Sample Name   | SPT-1           | Instrument Name | Agilent G6230 TOF MS | User Name     | KIB                  | IRM Calibration Status | Success |
| Data Filename | 20211105ESIA6.d | ACQ Method      | ESL.m                | Acquired Time | 11/5/2021 4:34:00 PM |                        |         |

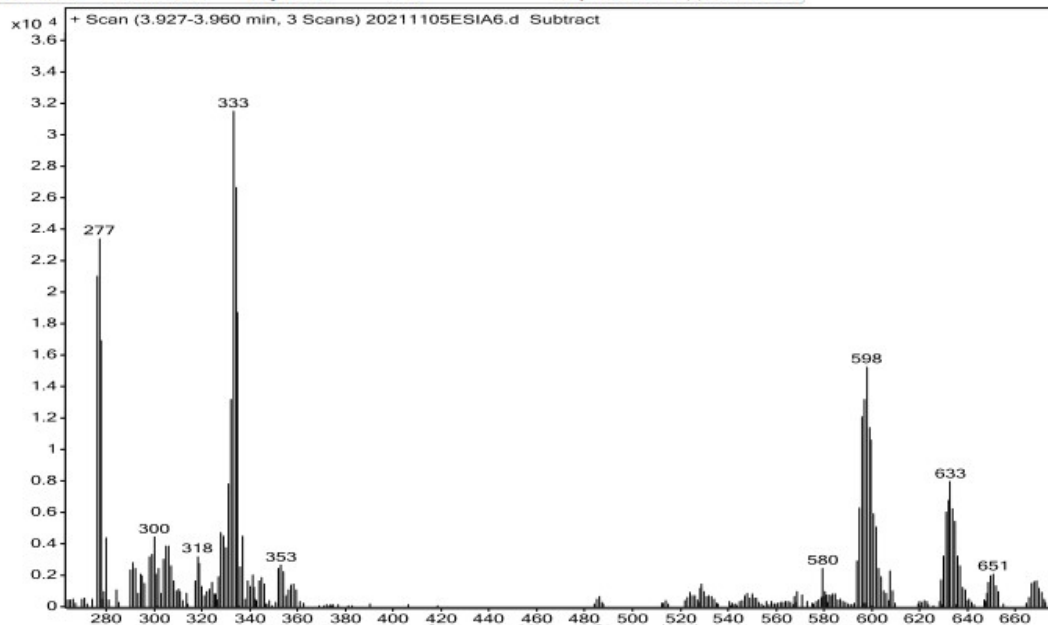

Fig. S4 MS spectra of SPT-1

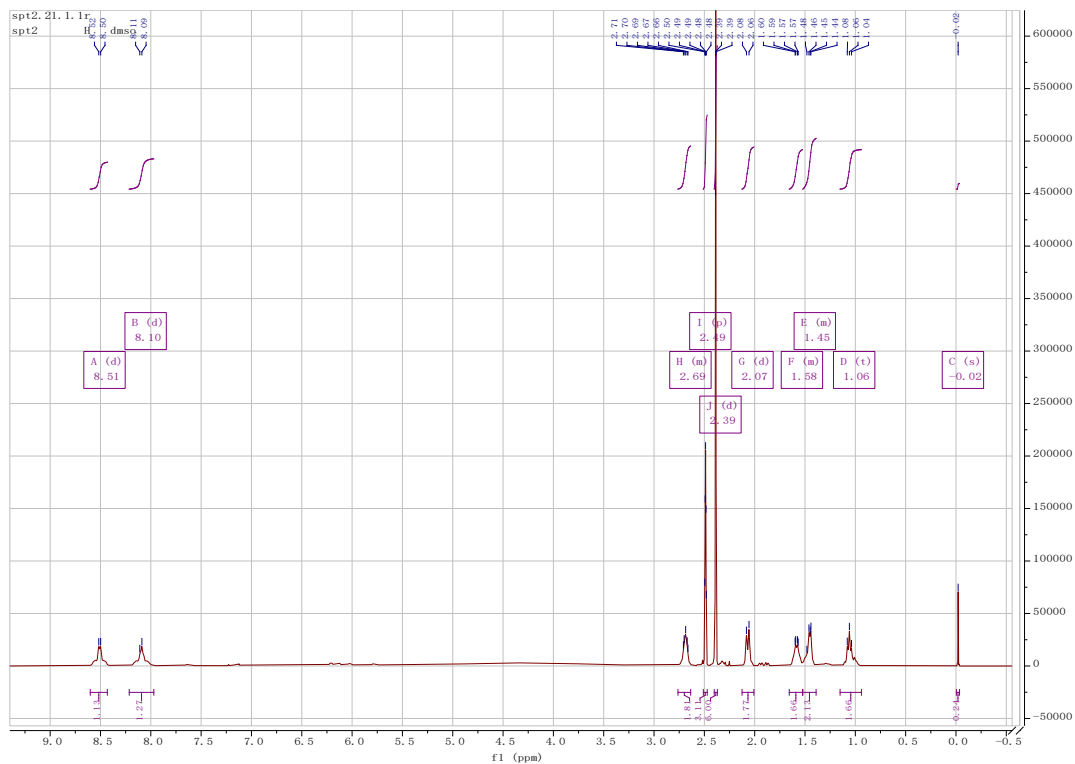

Fig. S5 <sup>1</sup>H NMR spectra of SPT-2

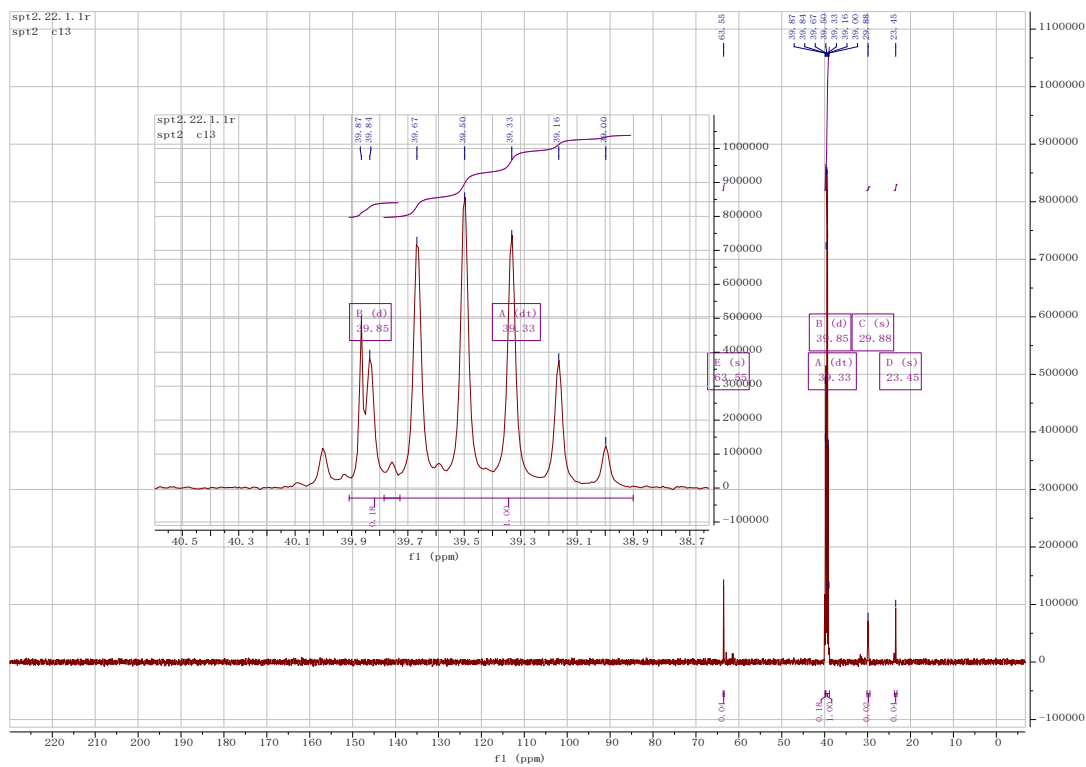

Fig. S6 <sup>13</sup>C NMR spectra of SPT-2

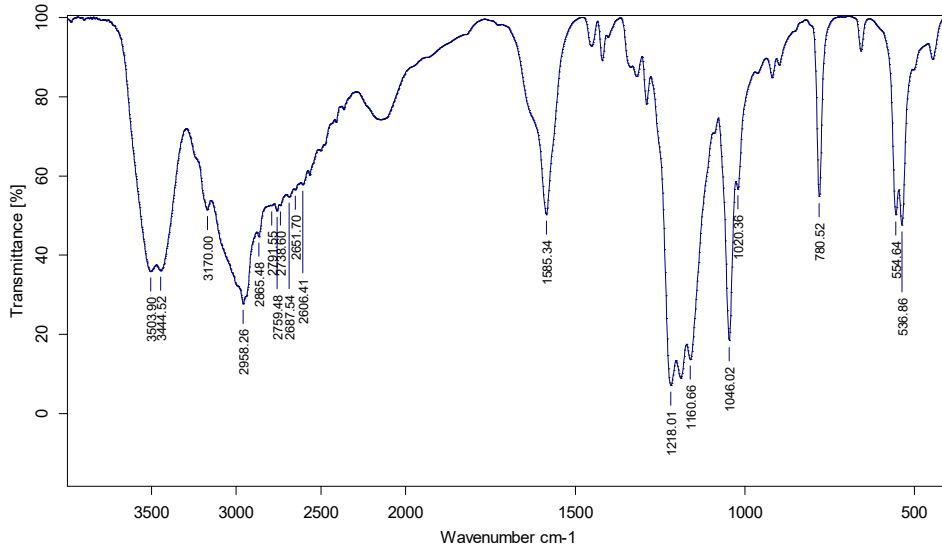

|  |  |  |  |
|--|--|--|--|
|  |  |  |  |
|  |  |  |  |
|  |  |  |  |

Fig. S7 IR spectra of SPT-2

|               |                 |                 |                      |               |                      |                        |         |
|---------------|-----------------|-----------------|----------------------|---------------|----------------------|------------------------|---------|
| Sample Name   | SPT-2           | Instrument Name | Agilent G6230 TOF MS | User Name     | KIB                  | IRM Calibration Status | Success |
| Data Filename | 20211105ESIA7.d | ACQ Method      | ESI.m                | Acquired Time | 11/5/2021 4:39:43 PM |                        |         |

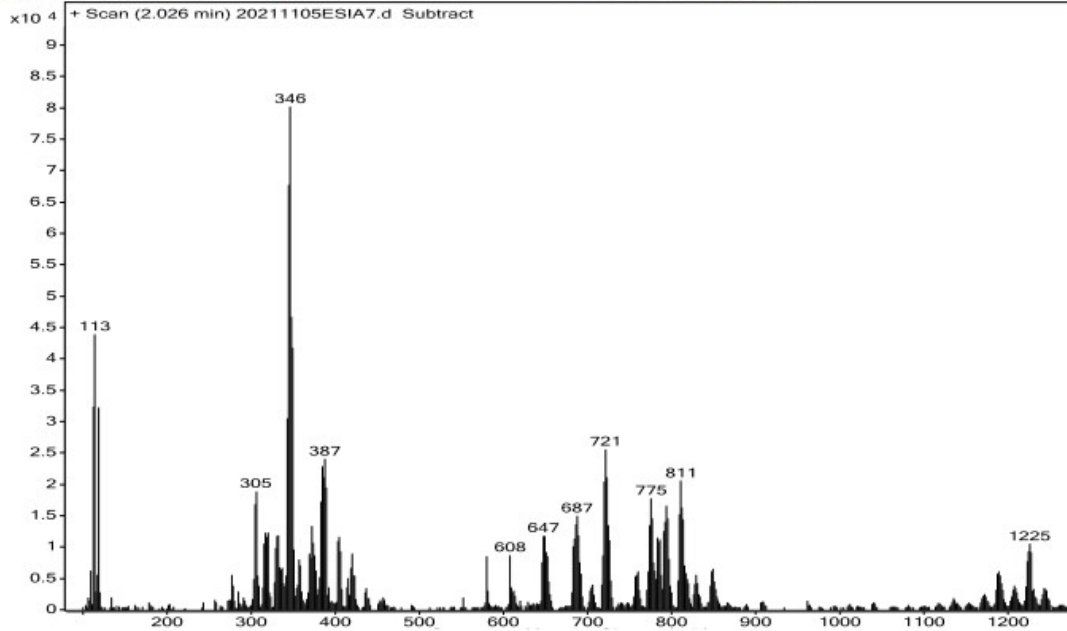

|               |                 |                 |                      |               |                      |                        |         |
|---------------|-----------------|-----------------|----------------------|---------------|----------------------|------------------------|---------|
| Sample Name   | SPT-2           | Instrument Name | Agilent G6230 TOF MS | User Name     | KIB                  | IRM Calibration Status | Success |
| Data Filename | 20211105ESIA7.d | ACQ Method      | ESL.m                | Acquired Time | 11/5/2021 4:39:43 PM |                        |         |

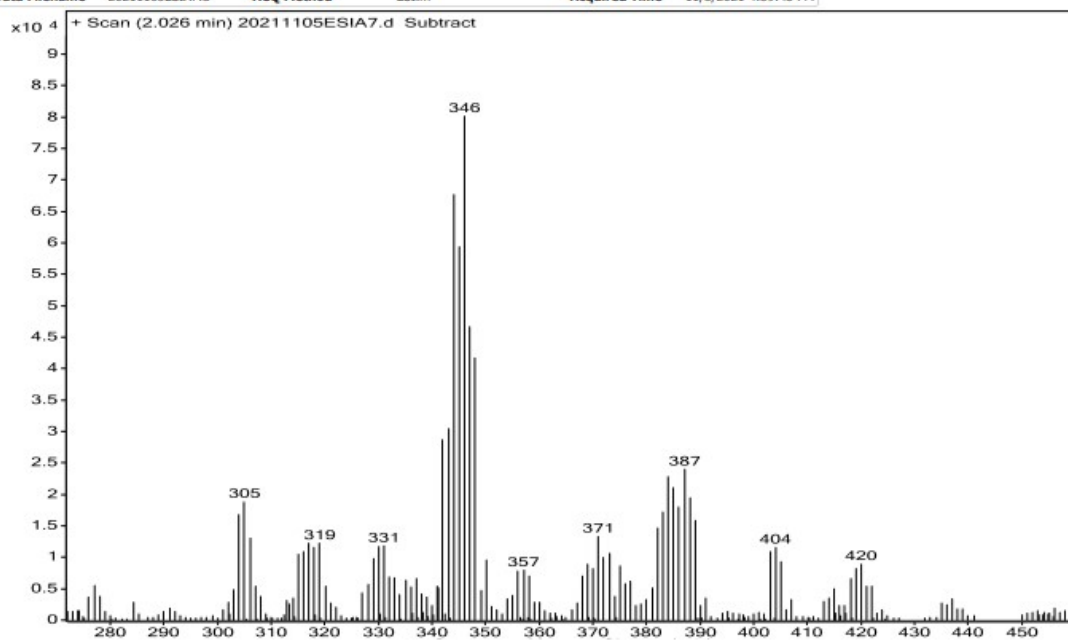

Fig. S8 MS spectra of SPT-2

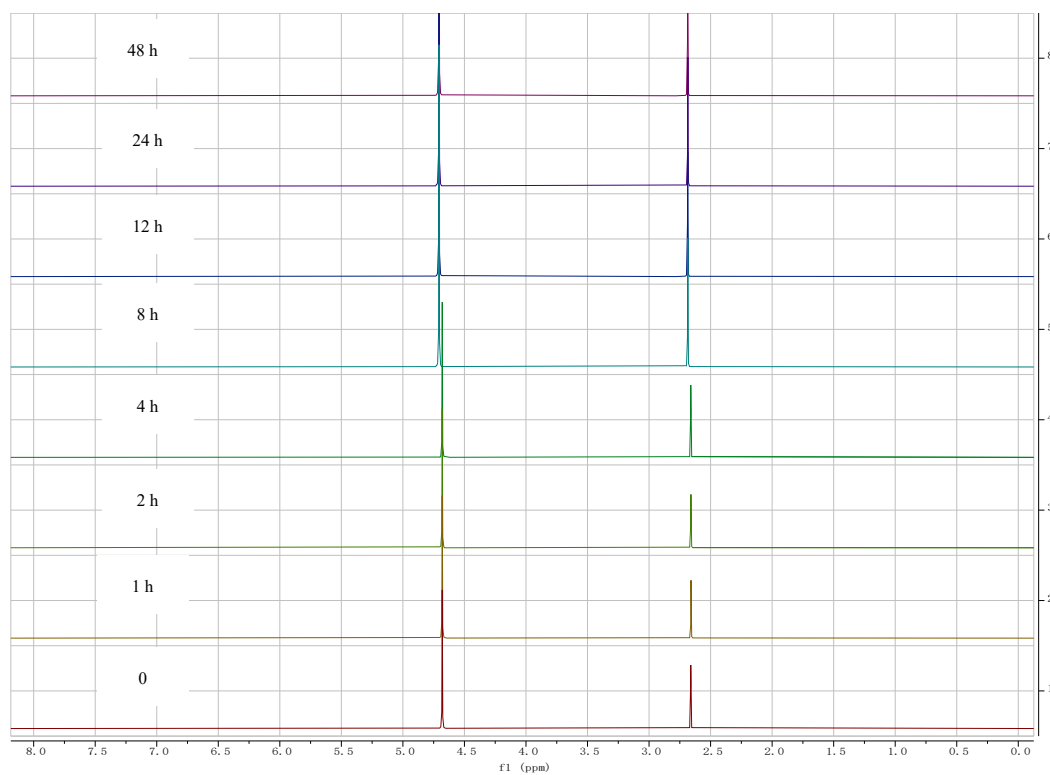

Fig. S9 The change in <sup>1</sup>H NMR of SPT-1 in D<sub>2</sub>O with the standing time.

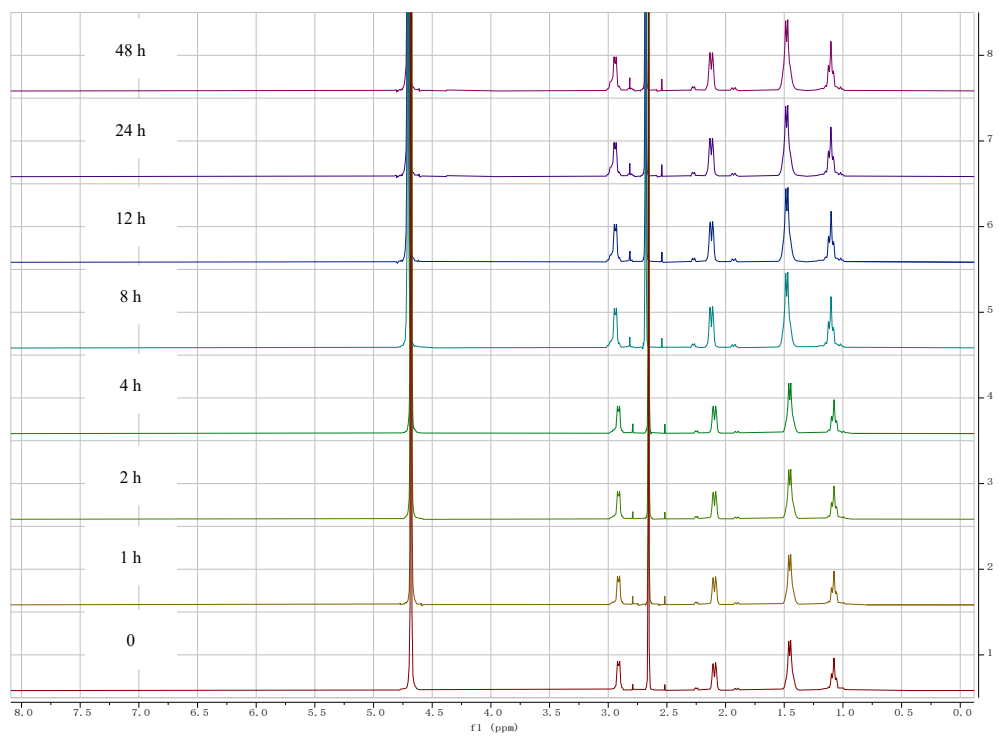

**Fig. S10** The change in  $^1\text{H}$  NMR of SPT-2 in  $\text{D}_2\text{O}$  with the standing time.
